# Supplementary material for: The genomic consequences and persistence of sociality in spiders
Source: HighWire-hosted journal article supplement (doi:10.1101/gr.279503.124), 2025-02-20
Supplement: Supplemental_Tables.xlsx [file Supplemental_Tables.xlsx]

## Sheet: README
Table S1	Metadata of sequenced individuals for DNA sequencing (Pacbio HiFi, HiC and short DNAseq)
Table S2	Summary of genome quality for de novo assemblies of 6 Stegodyphus species.
Table S3	Metadata of sequenced individuals for RNA sequencing.
Table S4	Summary of run out of heterozygosity (ROH) regions in S. dumicola.
Table S5	Fractions of common variants in S. dumicola and S. mimosarum populations.
Table S6	Fractions of variants that are fixed differently between populations in S. dumicola and S. mimosarum.
Table S7	RepeatMasker results for species with chromosome-level assemblies.

## Sheet: Table S1 Sequences for genome 6
Project ID	BioSample	Species	Nest	Sequencing	Sample location	Life stage	Data size	# reads	mean read length
Genome assembly
PRJNA994315	SAMN36425927	Stegodyphus dumicola	Sdum_Otavi_A	DNA - long reads	Namibia - Otavi	Adult	69 gb	4904287	14.0 kb
PRJNA994315	SAMN36429366	Stegodyphus tentorricola	Sten_Tierberg_A	DNA - long reads	South Africa - Tierberg	Adult	66 gb	5743845	8.6/14.0 kb (a)
PRJNA994315	SAMN36429617	Stegodyphus mimosarum	Smim_Weenen_A	DNA - long reads	South Africa - Weenen	Adult	80 gb	5960688	13.4 kb
PRJNA994315	SAMN36429618	Stegodyphus sarasinorum	Ssar_Unknown_A	DNA - long reads	India - Unknown	Adult	85 gb	5610732	15.1 kb
PRJNA994315	SAMN36429619	Stegodyphus bicolor	Sbic_Betta_A	DNA - long reads	Namibia - Betta	Adult	99 gb	5578250	15.1 kb
PRJNA994315	SAMN36429620	Stegodyphus lineatus	Slin_Negev_A	DNA - long reads	Israel - Negev Desert	Adult	90 gb	6437149	14.0 kb
PRJNA994315	SAMN41002150	Stegodyphus dumicola	Sdum_Otavi_A	DNA - hi-C	Namibia - Otavi	Adult	153 gb
PRJNA994315	SAMN41002151	Stegodyphus tentorricola	Sten_Tierberg_B	DNA - hi-C	South Africa - Tierberg	Adult	144 gb
PRJNA994315	SAMN41002154	Stegodyphus mimosarum	Smim_Weenen_A	DNA - hi-C	South Africa - Weenen	Adult	139 gb
PRJNA994315	SAMN41002153	Stegodyphus sarasinorum	Ssar_Unknown_A	DNA - hi-C	India - Unknown	Adult	143 gb
PRJNA994315	SAMN41002152	Stegodyphus bicolor	Sbic_Betta_B	DNA - hi-C	Namibia - Betta	Adult	143 gb
PRJNA994315	SAMN41002155	Stegodyphus lineatus	Slin_Negev_B	DNA - hi-C	Israel - Negev Desert	Adult	144 gb
social dN/dS estimation
PRJNA994315	SAMN43826667	Stegodyphus dumicola	Sdum_Otavi_B	DNA - short reads	Namibia - Otavi	Adult	40 gb
PRJNA994315	SAMN43826668	Stegodyphus dumicola	Sdum_Karasburg	DNA - short reads	Namibia - Karasburg	Adult	44 gb
PRJNA994315	SAMN43826669	Stegodyphus mimosarum	Smim_ Weenen_B	DNA - short reads	South Africa - Weenen	Adult	83 gb
PRJNA994315	SAMN43826670	Stegodyphus mimosarum	Smim_Antananarivo	DNA - short reads	Madagascar - Antananarivo	Adult	91 gb
PRJNA994315	SAMN43826671	Stegodyphus sarasinorum	Ssar_Sri Lanka (b)	DNA - short reads	Sri Lanka (b)	Adult	73 gb
PRJNA994315	SAMN43826672	Stegodyphus sarasinorum	Ssar_Himalaya (b)	DNA - short reads	India - Himalaya (b)	Adult	66 gb
PRJNA994315	SAMN43826673,SAMN43826674,SAMN43826675,SAMN43826676,SAMN43826677	Stegodyphus pacificus	Spac_R2 (c)	DNA - short reads	India - R2 (c)	Adult	146 gb
PRJNA994315	SAMN45851431	Stegodyphus dumicola	Sdum_Karasburg_163	DNA - short reads	Namibia - Karasburg	Adult
PRJNA994315	SAMN45851432	Stegodyphus dumicola	Sdum_Karasburg_169	DNA - short reads	Namibia - Karasburg	Adult
PRJNA994315	SAMN45851433	Stegodyphus dumicola	Sdum_Karasburg_178	DNA - short reads	Namibia - Karasburg	Adult
PRJNA994315	SAMN45851434	Stegodyphus dumicola	Sdum_Karasburg_181	DNA - short reads	Namibia - Karasburg	Adult
PRJNA994315	SAMN45851435	Stegodyphus dumicola	Sdum_Karasburg_455	DNA - short reads	Namibia - Karasburg	Adult
PRJNA994315	SAMN45851436	Stegodyphus dumicola	Sdum_Karasburg_488	DNA - short reads	Namibia - Karasburg	Adult
PRJNA994315	SAMN45851437	Stegodyphus dumicola	Sdum_Karasburg_645	DNA - short reads	Namibia - Karasburg	Adult
PRJNA994315	SAMN45851438	Stegodyphus dumicola	Sdum_Karasburg_737	DNA - short reads	Namibia - Karasburg	Adult
PRJNA994315	SAMN45851439	Stegodyphus dumicola	Sdum_Karasburg_890	DNA - short reads	Namibia - Karasburg	Adult
PRJNA994315	SAMN45851440	Stegodyphus dumicola	Sdum_Otawi_144	DNA - short reads	Namibia - Otavi	Adult
PRJNA994315	SAMN45851441	Stegodyphus dumicola	Sdum_Otawi_162	DNA - short reads	Namibia - Otavi	Adult
PRJNA994315	SAMN45851442	Stegodyphus dumicola	Sdum_Otawi_186	DNA - short reads	Namibia - Otavi	Adult
PRJNA994315	SAMN45851443	Stegodyphus dumicola	Sdum_Otawi_231	DNA - short reads	Namibia - Otavi	Adult
PRJNA994315	SAMN45851444	Stegodyphus dumicola	Sdum_Otawi_266	DNA - short reads	Namibia - Otavi	Adult
PRJNA994315	SAMN45851445	Stegodyphus dumicola	Sdum_Otawi_297	DNA - short reads	Namibia - Otavi	Adult
PRJNA994315	SAMN45851446	Stegodyphus dumicola	Sdum_Otawi_317	DNA - short reads	Namibia - Otavi	Adult
PRJNA994315	SAMN45851447	Stegodyphus dumicola	Sdum_Otawi_357	DNA - short reads	Namibia - Otavi	Adult
PRJNA994315	SAMN45851448	Stegodyphus dumicola	Sdum_Otawi_415	DNA - short reads	Namibia - Otavi	Adult
PRJNA994315	SAMN45851449	Stegodyphus mimosarum	Smim_Antananarivo_133	DNA - short reads	Madagascar - Antananarivo	Adult
PRJNA994315	SAMN45851450	Stegodyphus mimosarum	Smim_Antananarivo_134	DNA - short reads	Madagascar - Antananarivo	Adult
PRJNA994315	SAMN45851451	Stegodyphus mimosarum	Smim_Antananarivo_135	DNA - short reads	Madagascar - Antananarivo	Adult
PRJNA994315	SAMN45851452	Stegodyphus mimosarum	Smim_Antananarivo_136	DNA - short reads	Madagascar - Antananarivo	Adult
PRJNA994315	SAMN45851453	Stegodyphus mimosarum	Smim_Antananarivo_137	DNA - short reads	Madagascar - Antananarivo	Adult
PRJNA994315	SAMN45851454	Stegodyphus mimosarum	Smim_Antananarivo_138	DNA - short reads	Madagascar - Antananarivo	Adult
PRJNA994315	SAMN45851455	Stegodyphus mimosarum	Smim_Wee_145	DNA - short reads	South Africa - Weenen	Adult
PRJNA994315	SAMN45851456	Stegodyphus mimosarum	Smim_Wee_147	DNA - short reads	South Africa - Weenen	Adult
PRJNA994315	SAMN45851457	Stegodyphus mimosarum	Smim_Wee_148	DNA - short reads	South Africa - Weenen	Adult
PRJNA994315	SAMN45851458	Stegodyphus mimosarum	Smim_Wee_149	DNA - short reads	South Africa - Weenen	Adult
PRJNA994315	SAMN45851459	Stegodyphus mimosarum	Smim_Wee_151	DNA - short reads	South Africa - Weenen	Adult
PRJNA994315	SAMN45851460	Stegodyphus mimosarum	Smim_Wee_152	DNA - short reads	South Africa - Weenen	Adult
PRJNA994315	SAMN45851461	Stegodyphus mimosarum	Smim_Wee_153	DNA - short reads	South Africa - Weenen	Adult
SFS for N-sites and S-sites
PRJNA994315	SAMN43836153	Stegodpyhus dumicola	DUM_family1_male	DNA - short reads	Namibia - Otavi	Adult	117 gb
PRJNA994315	SAMN43836154	Stegodpyhus dumicola	DUM_family2_male	DNA - short reads	Namibia - Otavi	Adult	109 gb
PRJNA994315	SAMN43836155	Stegodpyhus dumicola	DUM_family3_male	DNA - short reads	Namibia - Otavi	Adult	139 gb
PRJNA994315	SAMN43836156	Stegodpyhus dumicola	DUM_family4_male	DNA - short reads	Namibia - Otavi	Adult	108 gb
PRJNA994315	SAMN43836157	Stegodpyhus dumicola	DUM_family1_female	DNA - short reads	Namibia - Otavi	Adult	136 gb
PRJNA994315	SAMN43836158	Stegodpyhus dumicola	DUM_family2_female	DNA - short reads	Namibia - Otavi	Adult	191 gb
PRJNA994315	SAMN43836159	Stegodpyhus dumicola	DUM_family3_female	DNA - short reads	Namibia - Otavi	Adult	114 gb
PRJNA994315	SAMN43836160	Stegodpyhus dumicola	DUM_family4_female	DNA - short reads	Namibia - Otavi	Adult	95 gb
PRJNA994315	SAMN43836161	Stegodpyhus dumicola	DUM_family5_female	DNA - short reads	Namibia - Otavi	Adult	131 gb
Sex chromosome identification
PRJNA994315	SAMN43836162	Stegodyphus mimosarum	MIM_family1_male	DNA - short reads	South Africa - Weenen	Adult	155 gb
PRJNA994315	SAMN43836163	Stegodyphus sarasinorum	SAR_family1_male	DNA - short reads	India - Unknown	Adult	120 gb
PRJNA994315	SAMN43836164	Stegodyphus tentoriicola	TEN_family1_male	DNA - short reads	South Africa - Tierberg	Adult	103 gb
PRJNA994315	SAMN43836165	Stegodyphus bicolor	BIC_family1_male	DNA - short reads	Namibia - Betta	Adult	108 gb
PRJNA994315	SAMN43836166	Stegodyphus lineatus	LIN_family1_male	DNA - short reads	Israel - Negev Desert	Adult	169 gb

## Sheet: Table S2. Genome Quality
Mertrics	Stegodyphus lineatus		Stegodyphus mimosarum	Stegodyphus bicolor		Stegodyphus sarasinorum	Stegodyphus tentoriicola		Stegodyphus dumicola
Haplotype*	haplotype 1	haplotype 2	haplotype 1	haplotype 1	haplotype 2	haplotype 1	haplotype 1	haplotype 2	haplotype 1
Total length (Ns exlucded)	2718272445	2227262044	3160690015	3210091373	3039784404	3491172227	3464899819	3193184505	3549285226
Chromosome length (Ns exlucded)	2658087223	2174052385	2909980658	2984312044	2898724151	3320850384	2983374484	2870820652	3146199242
Chromosome percentage	0.977859	0.97611	0.920679	0.929666	0.953595	0.951214	0.861028	0.899046	0.886432
Number of chromosome	23	20	16	16	16	16	14	14	14
Number of contigs	317	274	275	305	266	529	1945	1824	549
N50	26179817	25626037	24037211	41046466	40358879	20312815	4020725	3886932	19488338
kmer completeness (haploid)	0.8272	-	0.9894	0.9506	-	0.9879	0.8941	-	0.982
Consensus Quality (haploid)	73.56	-	65.78	69.99	-	68.73	62.59	-	65.8
kmer completeness (diploid)	0.9941		-	0.9903		-	0.9765		-
Consensus Quality (diploid)	73.86		-	70.05		-	62.54		-
BUSCO C (genome)	96.8% [S:93.3%,D:3.5%]	-	96.2% [S:92.8%,D:3.4%]	95.7% [S:92.4%,D:3.3%]	-	95.1% [S:91.7%,D:3.4%]	95.6% [S:91.1%,D:4.5%]	-	96.2% [S:92.8%,D:4.3%]
BUSCO F (genome)	3.2% [F:1.8%,M:1.4%]	-	3.8% [F:2.2%,M:1.6%]	4.3% [F:2.5%,M:1.8%]	-	4.9% [F:2.7%,M:2.2%]	4.4% [F:2.0%,M:2.4%]	-	4.8% [F:2.1%,M:1.7%]
Gene number	32095	-	35485	35097	-	47072	35727	-	34097
BUSCO C (gene)	98.0% [S:94.1%,D:3.9%]	-	95.8% [S:92.4%,D:3.4%]	95.4% [S:92.3%,D:3.1%]	-	96.5% [S:93.1%,D:3.4%]	96.6% [S:91.3%,D:5.3%]	-	94.4% [S:91.0%,D:3.4%]
BUSCO F (gene)	2.0% [F:0.9%,M:1.1%]	-	4.2% [F:1.6%,M:2.6%]	4.6% [F:2.1%,M:2.5%]	-	3.5% [F:1.5%,M:2.0%]	3.4% [F:1.3%,M:2.1%]	-	5.6% [F:2.1%,M:3.5%]
repeat fraction	58.72 %		57.17 %	61.98 %		62.12 %	64.59 %		64.53 %

## Sheet: Table S3 RNA seq
BioProject	BioSample	Species	Sibling groups	ID	Sequencing	Sample location	Life stage	Data size
Genome annotation
PRJNA994315	SAMN41893977	Stegodyphus dumicola	D1	D-S-1	RNA	Namibia - Otavi	Spiderlings	7.2 gb
PRJNA994315	SAMN41893978	Stegodyphus dumicola	D1	D-S-2	RNA	Namibia - Otavi	Spiderlings	8.4 gb
PRJNA994315	SAMN41893979	Stegodyphus dumicola	D1	D-S-3	RNA	Namibia - Otavi	Spiderlings	5.2 gb
PRJNA994315	SAMN41893980	Stegodyphus dumicola	D2	D-S-4	RNA	Namibia - Otavi	Spiderlings	6.9 gb
PRJNA994315	SAMN41893981	Stegodyphus dumicola	D2	D-S-5	RNA	Namibia - Otavi	Spiderlings	8.3 gb
PRJNA994315	SAMN41893982	Stegodyphus dumicola	D2	D-S-6	RNA	Namibia - Otavi	Spiderlings	5.4 gb
PRJNA994315	SAMN41893983	Stegodyphus dumicola	D3	D-S-9	RNA	Namibia - Otavi	Spiderlings	6.7 gb
PRJNA994315	SAMN41893984	Stegodyphus dumicola	D4	D-S-10	RNA	Namibia - Otavi	Spiderlings	9.0 gb
PRJNA994315	SAMN41893985	Stegodyphus dumicola	D4	D-S-11	RNA	Namibia - Otavi	Spiderlings	10.3 gb
PRJNA994315	SAMN41893986	Stegodyphus dumicola	D4	D-S-12	RNA	Namibia - Otavi	Spiderlings	7.1 gb
PRJNA994315	SAMN41893987	Stegodyphus dumicola	D2	D-SA-4	RNA	Namibia - Otavi	Subadults	9.8 gb
PRJNA994315	SAMN41893988	Stegodyphus dumicola	D2	D-SA-5	RNA	Namibia - Otavi	Subadults	9.7 gb
PRJNA994315	SAMN41893989	Stegodyphus dumicola	D2	D-SA-6	RNA	Namibia - Otavi	Subadults	8.7 gb
PRJNA994315	SAMN41893990	Stegodyphus dumicola	D3	D-SA-7	RNA	Namibia - Otavi	Subadults	7.1 gb
PRJNA994315	SAMN41893991	Stegodyphus dumicola	D3	D-SA-8	RNA	Namibia - Otavi	Subadults	9.4 gb
PRJNA994315	SAMN41893992	Stegodyphus dumicola	D3	D-SA-9	RNA	Namibia - Otavi	Subadults	7.5 gb
PRJNA994315	SAMN41893993	Stegodyphus dumicola	D4	D-SA-10	RNA	Namibia - Otavi	Subadults	10.3 gb
PRJNA994315	SAMN41893994	Stegodyphus dumicola	D4	D-SA-12	RNA	Namibia - Otavi	Subadults	9.2 gb
PRJNA994315	SAMN41893995	Stegodyphus dumicola	D5	D-A-1	RNA	Namibia - Otavi	Adults	8.7 gb
PRJNA994315	SAMN41893996	Stegodyphus dumicola	D5	D-A-2	RNA	Namibia - Otavi	Adults	6.0 gb
PRJNA994315	SAMN41893997	Stegodyphus dumicola	D5	D-A-3	RNA	Namibia - Otavi	Adults	6.2 gb
PRJNA994315	SAMN41893998	Stegodyphus dumicola	D6	D-A-4	RNA	Namibia - Otavi	Adults	6.1 gb
PRJNA994315	SAMN41893999	Stegodyphus dumicola	D6	D-A-5	RNA	Namibia - Otavi	Adults	6.2 gb
PRJNA994315	SAMN41894000	Stegodyphus dumicola	D6	D-A-6	RNA	Namibia - Otavi	Adults	7.2 gb
PRJNA994315	SAMN41894001	Stegodyphus dumicola	D7	D-A-10	RNA	Namibia - Otavi	Adults	8.0 gb
PRJNA994315	SAMN41894002	Stegodyphus dumicola	D7	D-A-11	RNA	Namibia - Otavi	Adults	7.5 gb
PRJNA994315	SAMN41894003	Stegodyphus dumicola	D7	D-A-12	RNA	Namibia - Otavi	Adults	3.2 gb
PRJNA994315	SAMN41921875	Stegodyphus tentorricola	T1	T-S-1	RNA	South Africa	Spiderlings	9.2 gb
PRJNA994315	SAMN41921876	Stegodyphus tentorricola	T1	T-S-2	RNA	South Africa	Spiderlings	12.3 gb
PRJNA994315	SAMN41921877	Stegodyphus tentorricola	T1	T-S-3	RNA	South Africa	Spiderlings	16.3 gb
PRJNA994315	SAMN41921878	Stegodyphus tentorricola	T2	T-S-4	RNA	South Africa	Spiderlings	9.2 gb
PRJNA994315	SAMN41921879	Stegodyphus tentorricola	T2	T-S-5	RNA	South Africa	Spiderlings	6.6 gb
PRJNA994315	SAMN41921880	Stegodyphus tentorricola	T2	T-S-6	RNA	South Africa	Spiderlings	6.0 gb
PRJNA994315	SAMN41921881	Stegodyphus tentorricola	T3	T-S-7	RNA	South Africa	Spiderlings	10.1 gb
PRJNA994315	SAMN41921882	Stegodyphus tentorricola	T3	T-S-8	RNA	South Africa	Spiderlings	8.5 gb
PRJNA994315	SAMN41921883	Stegodyphus tentorricola	T3	T-S-9	RNA	South Africa	Spiderlings	4.5 gb
PRJNA994315	SAMN41921884	Stegodyphus tentorricola	T4	T-S-10	RNA	South Africa	Spiderlings	5.7 gb
PRJNA994315	SAMN41921885	Stegodyphus tentorricola	T4	T-S-11	RNA	South Africa	Spiderlings	6.2 gb
PRJNA994315	SAMN41921886	Stegodyphus tentorricola	T4	T-S-12	RNA	South Africa	Spiderlings	8.1 gb
PRJNA994315	SAMN41921887	Stegodyphus tentorricola	T5	T-SA-1	RNA	South Africa	Subadults	6.7 gb
PRJNA994315	SAMN41921888	Stegodyphus tentorricola	T5	T-SA-2	RNA	South Africa	Subadults	9.2 gb
PRJNA994315	SAMN41921889	Stegodyphus tentorricola	T5	T-SA-3	RNA	South Africa	Subadults	9.1 gb
PRJNA994315	SAMN41921890	Stegodyphus tentorricola	T6	T-SA-4	RNA	South Africa	Subadults	5.1 gb
PRJNA994315	SAMN41921891	Stegodyphus tentorricola	T6	T-SA-5	RNA	South Africa	Subadults	8.7 gb
PRJNA994315	SAMN41921892	Stegodyphus tentorricola	T6	T-SA-6	RNA	South Africa	Subadults	9.6 gb
PRJNA994315	SAMN41921893	Stegodyphus tentorricola	T7	T-SA-7	RNA	South Africa	Subadults	14.8 gb
PRJNA994315	SAMN41921894	Stegodyphus tentorricola	T7	T-SA-8	RNA	South Africa	Subadults	6.0 gb
PRJNA994315	SAMN41921895	Stegodyphus tentorricola	T7	T-SA-9	RNA	South Africa	Subadults	10.6 gb
PRJNA994315	SAMN41921896	Stegodyphus tentorricola	T8	T-A-1	RNA	South Africa	Adults	5.8 gb
PRJNA994315	SAMN41921897	Stegodyphus tentorricola	T8	T-A-2	RNA	South Africa	Adults	8.7 gb
PRJNA994315	SAMN41921898	Stegodyphus tentorricola	T8	T-A-3	RNA	South Africa	Adults	5.2 gb
PRJNA994315	SAMN41921899	Stegodyphus tentorricola	T9	T-A-4	RNA	South Africa	Adults	6.2 gb
PRJNA994315	SAMN41921900	Stegodyphus tentorricola	T9	T-A-5	RNA	South Africa	Adults	6.1 gb
PRJNA994315	SAMN41921901	Stegodyphus tentorricola	T9	T-A-6	RNA	South Africa	Adults	6.5 gb
PRJNA994315	SAMN41921902	Stegodyphus tentorricola	T10	T-A-7	RNA	South Africa	Adults	6.1 gb
PRJNA994315	SAMN41921903	Stegodyphus tentorricola	T10	T-A-8	RNA	South Africa	Adults	5.5 gb
PRJNA994315	SAMN41921904	Stegodyphus tentorricola	T10	T-A-9	RNA	South Africa	Adults	9.0 gb
PRJNA994315	SAMN41942869	Stegodyphus mimosarum	M1	M-S-1	RNA	South Africa	Spiderlings	5.6 gb
PRJNA994315	SAMN41942870	Stegodyphus mimosarum	M1	M-S-2	RNA	South Africa	Spiderlings	6.1 gb
PRJNA994315	SAMN41942871	Stegodyphus mimosarum	M1	M-S-3	RNA	South Africa	Spiderlings	8.6 gb
PRJNA994315	SAMN41942872	Stegodyphus mimosarum	M2	M-S-4	RNA	South Africa	Spiderlings	9.4 gb
PRJNA994315	SAMN41942873	Stegodyphus mimosarum	M2	M-S-5	RNA	South Africa	Spiderlings	9.8 gb
PRJNA994315	SAMN41942874	Stegodyphus mimosarum	M2	M-S-6	RNA	South Africa	Spiderlings	8.7 gb
PRJNA994315	SAMN41942875	Stegodyphus mimosarum	M3	M-S-7	RNA	South Africa	Spiderlings	9.5 gb
PRJNA994315	SAMN41942876	Stegodyphus mimosarum	M3	M-S-8	RNA	South Africa	Spiderlings	10.6 gb
PRJNA994315	SAMN41942877	Stegodyphus mimosarum	M3	M-S-9	RNA	South Africa	Spiderlings	10.3 gb
PRJNA994315	SAMN41942878	Stegodyphus mimosarum	M1	M-SA-1	RNA	South Africa	Subadults	9.8 gb
PRJNA994315	SAMN41942879	Stegodyphus mimosarum	M1	M-SA-2	RNA	South Africa	Subadults	9.2 gb
PRJNA994315	SAMN41942880	Stegodyphus mimosarum	M1	M-SA-3	RNA	South Africa	Subadults	10.4 gb
PRJNA994315	SAMN41942881	Stegodyphus mimosarum	M2	M-SA-4	RNA	South Africa	Subadults	13.6 gb
PRJNA994315	SAMN41942882	Stegodyphus mimosarum	M2	M-SA-5	RNA	South Africa	Subadults	11.1 gb
PRJNA994315	SAMN41942883	Stegodyphus mimosarum	M2	M-SA-6	RNA	South Africa	Subadults	11.4 gb
PRJNA994315	SAMN41942884	Stegodyphus mimosarum	M4	M-SA-7	RNA	South Africa	Subadults	11.1 gb
PRJNA994315	SAMN41942885	Stegodyphus mimosarum	M4	M-SA-8	RNA	South Africa	Subadults	8.5 gb
PRJNA994315	SAMN41942886	Stegodyphus mimosarum	M4	M-SA-9	RNA	South Africa	Subadults	10.9 gb
PRJNA994315	SAMN41942887	Stegodyphus mimosarum	M5	M-SA-10	RNA	South Africa	Subadults	8.7 gb
PRJNA994315	SAMN41942888	Stegodyphus mimosarum	M5	M-SA-11	RNA	South Africa	Subadults	9.8 gb
PRJNA994315	SAMN41942889	Stegodyphus mimosarum	M5	M-SA-12	RNA	South Africa	Subadults	9.9 gb
PRJNA994315	SAMN41942890	Stegodyphus mimosarum	M3	M-SA-13	RNA	South Africa	Subadults	7.4 gb
PRJNA994315	SAMN41942891	Stegodyphus mimosarum	M3	M-SA-14	RNA	South Africa	Subadults	15.0 gb
PRJNA994315	SAMN41942892	Stegodyphus mimosarum	M3	M-SA-15	RNA	South Africa	Subadults	10.1 gb
PRJNA994315	SAMN41942893	Stegodyphus mimosarum	M4	M-A-4	RNA	South Africa	Adults	9.2 gb
PRJNA994315	SAMN41942894	Stegodyphus mimosarum	M4	M-A-5	RNA	South Africa	Adults	8.6 gb
PRJNA994315	SAMN41942895	Stegodyphus mimosarum	M4	M-A-6	RNA	South Africa	Adults	10.9 gb
PRJNA994315	SAMN41942896	Stegodyphus mimosarum	M3	M-A-7	RNA	South Africa	Adults	10.1 gb
PRJNA994315	SAMN41942897	Stegodyphus mimosarum	M3	M-A-8	RNA	South Africa	Adults	7.4 gb
PRJNA994315	SAMN41942898	Stegodyphus mimosarum	M3	M-A-9	RNA	South Africa	Adults	8.0 gb
PRJNA994315	SAMN41942899	Stegodyphus mimosarum	M6	M-A-10	RNA	South Africa	Adults	9.2 gb
PRJNA994315	SAMN41942900	Stegodyphus mimosarum	M6	M-A-11	RNA	South Africa	Adults	9.3 gb
PRJNA994315	SAMN41942901	Stegodyphus mimosarum	M6	M-A-12	RNA	South Africa	Adults	12.2 gb
PRJNA994315	SAMN41947210	Stegodyphus sarasinorum	S1	S-S-1	RNA	India - Unknown	Spiderlings	7.4 gb
PRJNA994315	SAMN41947211	Stegodyphus sarasinorum	S1	S-S-2	RNA	India - Unknown	Spiderlings	11.1 gb
PRJNA994315	SAMN41947212	Stegodyphus sarasinorum	S1	S-S-3	RNA	India - Unknown	Spiderlings	8.4 gb
PRJNA994315	SAMN41947213	Stegodyphus sarasinorum	S2	S-S-6	RNA	India - Unknown	Spiderlings	6.5 gb
PRJNA994315	SAMN41947214	Stegodyphus sarasinorum	S2	S-S-7	RNA	India - Unknown	Spiderlings	7.8 gb
PRJNA994315	SAMN41947215	Stegodyphus sarasinorum	S2	S-S-8	RNA	India - Unknown	Spiderlings	9.1 gb
PRJNA994315	SAMN41947216	Stegodyphus sarasinorum	S3	S-S-11	RNA	India - Unknown	Spiderlings	16.0 gb
PRJNA994315	SAMN41947217	Stegodyphus sarasinorum	S3	S-S-12	RNA	India - Unknown	Spiderlings	10.5 gb
PRJNA994315	SAMN41947218	Stegodyphus sarasinorum	S3	S-S-13	RNA	India - Unknown	Spiderlings	28.3 gb
PRJNA994315	SAMN41947219	Stegodyphus sarasinorum	S3	S-SA-1	RNA	India - Unknown	Subadults	21.2 gb
PRJNA994315	SAMN41947220	Stegodyphus sarasinorum	S3	S-SA-2	RNA	India - Unknown	Subadults	9.6 gb
PRJNA994315	SAMN41947221	Stegodyphus sarasinorum	S3	S-SA-3	RNA	India - Unknown	Subadults	8.1 gb
PRJNA994315	SAMN41947222	Stegodyphus sarasinorum	S4	S-SA-6	RNA	India - Unknown	Subadults	7.8 gb
PRJNA994315	SAMN41947223	Stegodyphus sarasinorum	S4	S-SA-7	RNA	India - Unknown	Subadults	10.0 gb
PRJNA994315	SAMN41947224	Stegodyphus sarasinorum	S4	S-SA-8	RNA	India - Unknown	Subadults	7.1 gb
PRJNA994315	SAMN41947225	Stegodyphus sarasinorum	S1	S-SA-11	RNA	India - Unknown	Subadults	6.5 gb
PRJNA994315	SAMN41947226	Stegodyphus sarasinorum	S1	S-SA-12	RNA	India - Unknown	Subadults	6.6 gb
PRJNA994315	SAMN41947227	Stegodyphus sarasinorum	S1	S-SA-13	RNA	India - Unknown	Subadults	5.9 gb
PRJNA994315	SAMN41947228	Stegodyphus sarasinorum	S1	S-A-16	RNA	India - Unknown	Adults	6.7 gb
PRJNA994315	SAMN41947229	Stegodyphus sarasinorum	S1	S-A-17	RNA	India - Unknown	Adults	6.7 gb
PRJNA994315	SAMN41947230	Stegodyphus sarasinorum	S1	S-A-18	RNA	India - Unknown	Adults	6.4 gb
PRJNA994315	SAMN41947231	Stegodyphus sarasinorum	S3	S-A-21	RNA	India - Unknown	Adults	5.8 gb
PRJNA994315	SAMN41947232	Stegodyphus sarasinorum	S3	S-A-22	RNA	India - Unknown	Adults	6.4 gb
PRJNA994315	SAMN41947233	Stegodyphus sarasinorum	S3	S-A-23	RNA	India - Unknown	Adults	8.1 gb
PRJNA994315	SAMN41947234	Stegodyphus sarasinorum	S4	S-A-31	RNA	India - Unknown	Adults	5.5 gb
PRJNA994315	SAMN41947235	Stegodyphus sarasinorum	S4	S-A-32	RNA	India - Unknown	Adults	7.5 gb
PRJNA994315	SAMN41947236	Stegodyphus sarasinorum	S4	S-A-33	RNA	India - Unknown	Adults	7.6 gb
PRJNA994315	SAMN41994682	Stegodyphus bicolor	B1	B-S-150a	RNA	South Africa	Spiderlings	6.8 gb
PRJNA994315	SAMN41994683	Stegodyphus bicolor	B1	B-S-150b	RNA	South Africa	Spiderlings	6.7 gb
PRJNA994315	SAMN41994684	Stegodyphus bicolor	B1	B-S-150c	RNA	South Africa	Spiderlings	6.8 gb
PRJNA994315	SAMN41994685	Stegodyphus bicolor	B2	B-S-182a	RNA	South Africa	Spiderlings	6.5 gb
PRJNA994315	SAMN41994686	Stegodyphus bicolor	B2	B-S-182b	RNA	South Africa	Spiderlings	6.6 gb
PRJNA994315	SAMN41994687	Stegodyphus bicolor	B2	B-S-182c	RNA	South Africa	Spiderlings	6.7 gb
PRJNA994315	SAMN41994688	Stegodyphus bicolor	B3	B-S-266a	RNA	South Africa	Spiderlings	5.5 gb
PRJNA994315	SAMN41994689	Stegodyphus bicolor	B3	B-S-266b	RNA	South Africa	Spiderlings	7.0 gb
PRJNA994315	SAMN41994690	Stegodyphus bicolor	B3	B-S-266c	RNA	South Africa	Spiderlings	7.3 gb
PRJNA994315	SAMN41994691	Stegodyphus bicolor	B1	B-SA-150a	RNA	South Africa	Subadults	7.5 gb
PRJNA994315	SAMN41994692	Stegodyphus bicolor	B1	B-SA-150b	RNA	South Africa	Subadults	6.7 gb
PRJNA994315	SAMN41994693	Stegodyphus bicolor	B1	B-SA-150c	RNA	South Africa	Subadults	6.9 gb
PRJNA994315	SAMN41994694	Stegodyphus bicolor	B2	B-SA-182a	RNA	South Africa	Subadults	6.9 gb
PRJNA994315	SAMN41994695	Stegodyphus bicolor	B2	B-SA-182b	RNA	South Africa	Subadults	7.1 gb
PRJNA994315	SAMN41994696	Stegodyphus bicolor	B2	B-SA-182c	RNA	South Africa	Subadults	6.6 gb
PRJNA994315	SAMN41994697	Stegodyphus bicolor	B3	B-SA-266a	RNA	South Africa	Subadults	7.4 gb
PRJNA994315	SAMN41994698	Stegodyphus bicolor	B3	B-SA-266b	RNA	South Africa	Subadults	8.0 gb
PRJNA994315	SAMN41994699	Stegodyphus bicolor	B3	B-SA-266c	RNA	South Africa	Subadults	8.5 gb
PRJNA994315	SAMN41994700	Stegodyphus bicolor	B1	B-A-150a	RNA	South Africa	Adults	6.8 gb
PRJNA994315	SAMN41994701	Stegodyphus bicolor	B1	B-A-150b	RNA	South Africa	Adults	6.2 gb
PRJNA994315	SAMN41994702	Stegodyphus bicolor	B1	B-A-150c	RNA	South Africa	Adults	6.7 gb
PRJNA994315	SAMN41994703	Stegodyphus bicolor	B2	B-A-182a	RNA	South Africa	Adults	6.0 gb
PRJNA994315	SAMN41994704	Stegodyphus bicolor	B2	B-A-182b	RNA	South Africa	Adults	6.1 gb
PRJNA994315	SAMN41994705	Stegodyphus bicolor	B2	B-A-182c	RNA	South Africa	Adults	6.3 gb
PRJNA994315	SAMN41994706	Stegodyphus bicolor	B3	B-A-266a	RNA	South Africa	Adults	6.0 gb
PRJNA994315	SAMN41994707	Stegodyphus bicolor	B3	B-A-266b	RNA	South Africa	Adults	7.0 gb
PRJNA994315	SAMN41994708	Stegodyphus bicolor	B3	B-A-266c	RNA	South Africa	Adults	6.6 gb
PRJNA994315	SAMN42000497	Stegodyphus lineatus	L1	L-S-1	RNA	Israel - Negev Desert	Spiderlings	7.6 gb
PRJNA994315	SAMN42000498	Stegodyphus lineatus	L1	L-S-2	RNA	Israel - Negev Desert	Spiderlings	6.7 gb
PRJNA994315	SAMN42000499	Stegodyphus lineatus	L1	L-S-3	RNA	Israel - Negev Desert	Spiderlings	7.0 gb
PRJNA994315	SAMN42000500	Stegodyphus lineatus	L2	L-S-6	RNA	Israel - Negev Desert	Spiderlings	9.2 gb
PRJNA994315	SAMN42000501	Stegodyphus lineatus	L2	L-S-7	RNA	Israel - Negev Desert	Spiderlings	6.4 gb
PRJNA994315	SAMN42000502	Stegodyphus lineatus	L2	L-S-8	RNA	Israel - Negev Desert	Spiderlings	6.3 gb
PRJNA994315	SAMN42000503	Stegodyphus lineatus	L3	L-S-11	RNA	Israel - Negev Desert	Spiderlings	6.1 gb
PRJNA994315	SAMN42000504	Stegodyphus lineatus	L3	L-S-12	RNA	Israel - Negev Desert	Spiderlings	6.1 gb
PRJNA994315	SAMN42000505	Stegodyphus lineatus	L3	L-S-13	RNA	Israel - Negev Desert	Spiderlings	7.2 gb
PRJNA994315	SAMN42000506	Stegodyphus lineatus	L1	L-SA-1	RNA	Israel - Negev Desert	Subadults	7.4 gb
PRJNA994315	SAMN42000507	Stegodyphus lineatus	L1	L-SA-2	RNA	Israel - Negev Desert	Subadults	9.0 gb
PRJNA994315	SAMN42000508	Stegodyphus lineatus	L1	L-SA-3	RNA	Israel - Negev Desert	Subadults	7.8 gb
PRJNA994315	SAMN42000509	Stegodyphus lineatus	L2	L-SA-6	RNA	Israel - Negev Desert	Subadults	7.8 gb
PRJNA994315	SAMN42000510	Stegodyphus lineatus	L2	L-SA-7	RNA	Israel - Negev Desert	Subadults	6.1 gb
PRJNA994315	SAMN42000511	Stegodyphus lineatus	L2	L-SA-8	RNA	Israel - Negev Desert	Subadults	9.4 gb
PRJNA994315	SAMN42000512	Stegodyphus lineatus	L3	L-SA-11	RNA	Israel - Negev Desert	Subadults	10.8 gb
PRJNA994315	SAMN42000513	Stegodyphus lineatus	L3	L-SA-12	RNA	Israel - Negev Desert	Subadults	7.2 gb
PRJNA994315	SAMN42000514	Stegodyphus lineatus	L3	L-SA-13	RNA	Israel - Negev Desert	Subadults	7.0 gb
PRJNA994315	SAMN42000515	Stegodyphus lineatus	L4	L-A-1	RNA	Israel - Negev Desert	Adults	7.7 gb
PRJNA994315	SAMN42000516	Stegodyphus lineatus	L4	L-A-2	RNA	Israel - Negev Desert	Adults	5.3 gb
PRJNA994315	SAMN42000517	Stegodyphus lineatus	L4	L-A-3	RNA	Israel - Negev Desert	Adults	6.6 gb
PRJNA994315	SAMN42000518	Stegodyphus lineatus	L5	L-A-4	RNA	Israel - Negev Desert	Adults	7.7 gb
PRJNA994315	SAMN42000519	Stegodyphus lineatus	L5	L-A-5	RNA	Israel - Negev Desert	Adults	7.9 gb
PRJNA994315	SAMN42000520	Stegodyphus lineatus	L5	L-A-6	RNA	Israel - Negev Desert	Adults	6.6 gb
PRJNA994315	SAMN42000521	Stegodyphus lineatus	L6	L-A-7	RNA	Israel - Negev Desert	Adults	7.3 gb
PRJNA994315	SAMN42000522	Stegodyphus lineatus	L6	L-A-8	RNA	Israel - Negev Desert	Adults	6.1 gb
PRJNA994315	SAMN42000523	Stegodyphus lineatus	L6	L-A-9	RNA	Israel - Negev Desert	Adults	7.4 gb
Trinity transcript assembly
PRJNA453114	SAMN08974679	Stegodyphus africanus			RNA	South Africa - KwaZulu-Natal		7.8 gb

## Sheet: Table S4. Run out of heterozygo
Individual	homozygous windows	heterzygous windows	homozygous fraction	window and step size	criteria for ROH
D_family1_41_female	243894	69970	0.777069	100kb, 10kb	No SNPs allowed
D_family1_46_male	200695	113169	0.639433	100kb, 10kb	No SNPs allowed
D_family2_42_female	243036	70828	0.774335	100kb, 10kb	No SNPs allowed
D_family2_47_male	232044	81820	0.739314	100kb, 10kb	No SNPs allowed
D_family3_43_female	220436	93428	0.70233	100kb, 10kb	No SNPs allowed
D_family3_48_male	232081	81783	0.739432	100kb, 10kb	No SNPs allowed
D_family4_44_female	187807	126057	0.598371	100kb, 10kb	No SNPs allowed
D_family4_49_male	235546	78318	0.750471	100kb, 10kb	No SNPs allowed
D_family5_45_female	270789	43075	0.862759	100kb, 10kb	No SNPs allowed

## Sheet: Table S5. Fraction of common va
Region	Threshold	Total_SNPs	Common_Variants	Fraction_Common	Species
Whole Genome	2	1928333	1880068	0.975	S. dumicola
Whole Genome	3	1928333	1814126	0.9408	S. dumicola
Whole Genome	4	1928333	1744890	0.9049	S. dumicola
Whole Genome	5	1928333	1638697	0.8498	S. dumicola
Whole Genome	6	1928333	1574151	0.8163	S. dumicola
Whole Genome	7	1928333	1495434	0.7755	S. dumicola
Whole Genome	8	1928333	1430815	0.742	S. dumicola
Whole Genome	9	1928333	1352881	0.7016	S. dumicola
Whole Genome	10	1928333	1280901	0.6643	S. dumicola
Whole Genome	2	7923351	7901324	0.9972	S. mimosarum
Whole Genome	3	7923351	7853974	0.9912	S. mimosarum
Whole Genome	4	7923351	7811361	0.9859	S. mimosarum
Whole Genome	5	7923351	7745646	0.9776	S. mimosarum
Whole Genome	6	7923351	7661922	0.967	S. mimosarum
Whole Genome	7	7923351	7569044	0.9553	S. mimosarum
Whole Genome	8	7923351	7401531	0.9341	S. mimosarum
Whole Genome	9	7923351	7319529	0.9238	S. mimosarum
Whole Genome	10	7923351	7251567	0.9152	S. mimosarum

## Sheet: Table S6. Fraction of fixed pol
Chromosome	Fixed_Differently_SNPs	Total_SNPs	Fraction_Fixed_Differently	Species
HiC_scaffold_1	35529	185653	0.1914	S. dumicola
HiC_scaffold_10	39253	104585	0.3753	S. dumicola
HiC_scaffold_11	11188	107115	0.1044	S. dumicola
HiC_scaffold_12	16288	128286	0.127	S. dumicola
HiC_scaffold_13	12292	115446	0.1065	S. dumicola
HiC_scaffold_14	9853	110991	0.0888	S. dumicola
HiC_scaffold_15	12431	78523	0.1583	S. dumicola
HiC_scaffold_16	106	2011	0.0527	S. dumicola
HiC_scaffold_2	34295	184131	0.1863	S. dumicola
HiC_scaffold_3	30632	191826	0.1597	S. dumicola
HiC_scaffold_4	21406	157868	0.1356	S. dumicola
HiC_scaffold_5	53941	144674	0.3728	S. dumicola
HiC_scaffold_6	230	3403	0.0676	S. dumicola
HiC_scaffold_7	17988	134258	0.134	S. dumicola
HiC_scaffold_8	26500	157616	0.1681	S. dumicola
HiC_scaffold_9	17479	121947	0.1433	S. dumicola
Whole genome	339411	1928333	0.176	S. dumicola
HiC_scaffold_1	450704	572595	0.7871	S. mimosarum
HiC_scaffold_10	353899	485955	0.7283	S. mimosarum
HiC_scaffold_11	500	1286	0.3888	S. mimosarum
HiC_scaffold_12	323184	429536	0.7524	S. mimosarum
HiC_scaffold_13	322755	422483	0.7639	S. mimosarum
HiC_scaffold_14	275121	394643	0.6971	S. mimosarum
HiC_scaffold_15	239320	380919	0.6283	S. mimosarum
HiC_scaffold_16	285863	402070	0.711	S. mimosarum
HiC_scaffold_17	269231	342123	0.7869	S. mimosarum
HiC_scaffold_18	369	912	0.4046	S. mimosarum
HiC_scaffold_2	513568	665133	0.7721	S. mimosarum
HiC_scaffold_3	518807	624784	0.8304	S. mimosarum
HiC_scaffold_4	464259	603738	0.769	S. mimosarum
HiC_scaffold_5	386974	572540	0.6759	S. mimosarum
HiC_scaffold_6	389540	487566	0.7989	S. mimosarum
HiC_scaffold_7	270904	520399	0.5206	S. mimosarum
HiC_scaffold_8	414291	505127	0.8202	S. mimosarum
HiC_scaffold_9	411043	511542	0.8035	S. mimosarum
Whole genome	5890332	7923351	0.7434	S. mimosarum

## Sheet: Table S7. RepeatMasker results
S. dumicola			S. tentoriicola			S. sarasinorum			S. bicolor			S. mimosarum			S. lineatus
Type	Fraction		Type	Fraction		Type	Fraction		Type	Fraction		Type	Fraction		Type	Fraction
Retroelements	13.75		Retroelements	14.33		Retroelements	14.56		Retroelements	13.57		Retroelements	10.86		Retroelements	10.88
SINEs:	0.12		SINEs:	0.05		SINEs:	0.18		SINEs:	0.2		SINEs:	0.13		SINEs:	0.12
Penelope	1.04		Penelope	1.35		Penelope	0.59		Penelope	0.86		Penelope	0.59		Penelope	0.37
LINEs:	4.47		LINEs:	4.81		LINEs:	4.2		LINEs:	5		LINEs:	3.52		LINEs:	3.2
CRE/SLACS	0		CRE/SLACS	0		CRE/SLACS	0		CRE/SLACS	0		CRE/SLACS	0		CRE/SLACS	0
L2/CR1/Rex	0.08		L2/CR1/Rex	0.05		L2/CR1/Rex	0.03		L2/CR1/Rex	0.09		L2/CR1/Rex	0.02		L2/CR1/Rex	0.08
R1/LOA/Jockey	1.75		R1/LOA/Jockey	1.72		R1/LOA/Jockey	1.67		R1/LOA/Jockey	2.17		R1/LOA/Jockey	1.47		R1/LOA/Jockey	1.28
R2/R4/NeSL	0.02		R2/R4/NeSL	0.01		R2/R4/NeSL	0.03		R2/R4/NeSL	0		R2/R4/NeSL	0.02		R2/R4/NeSL	0.01
RTE/Bov-B	0.1		RTE/Bov-B	0.07		RTE/Bov-B	0.07		RTE/Bov-B	0.08		RTE/Bov-B	0.11		RTE/Bov-B	0.05
L1/CIN4	0.05		L1/CIN4	0		L1/CIN4	0.01		L1/CIN4	0		L1/CIN4	0.01		L1/CIN4	0
LTR elements:	9.16		LTR elements:	9.46		LTR elements:	10.17		LTR elements:	8.37		LTR elements:	7.21		LTR elements:	7.57
BEL/Pao	1.83		BEL/Pao	1.8		BEL/Pao	3.56		BEL/Pao	1.78		BEL/Pao	1.31		BEL/Pao	1.03
Ty1/Copia	0.45		Ty1/Copia	0.61		Ty1/Copia	0.49		Ty1/Copia	0.52		Ty1/Copia	0.3		Ty1/Copia	0.51
Gypsy/DIRS1	6.71		Gypsy/DIRS1	6.59		Gypsy/DIRS1	5.53		Gypsy/DIRS1	5.82		Gypsy/DIRS1	5.27		Gypsy/DIRS1	5.79
Retroviral	0.01		Retroviral	0.21		Retroviral	0		Retroviral	0.01		Retroviral	0.03		Retroviral	0.01
DNA transposons	15.72		DNA transposons	15.82		DNA transposons	15.48		DNA transposons	15.16		DNA transposons	15.38		DNA transposons	16.03
hobo-Activator	2.57		hobo-Activator	2.44		hobo-Activator	2.29		hobo-Activator	2.63		hobo-Activator	2.46		hobo-Activator	3.53
Tc1-IS630-Pogo	9.08		Tc1-IS630-Pogo	8.28		Tc1-IS630-Pogo	9.46		Tc1-IS630-Pogo	8.47		Tc1-IS630-Pogo	10.44		Tc1-IS630-Pogo	10.06
En-Spm	0		En-Spm	0		En-Spm	0		En-Spm	0		En-Spm	0		En-Spm	0
MuDR-IS905	0		MuDR-IS905	0.01		MuDR-IS905	0.01		MuDR-IS905	0.01		MuDR-IS905	0		MuDR-IS905	0.01
PiggyBac	0.56		PiggyBac	0.54		PiggyBac	0.48		PiggyBac	0.59		PiggyBac	0.39		PiggyBac	0.34
Tourist/Harbinger	0.04		Tourist/Harbinger	0.06		Tourist/Harbinger	0.05		Tourist/Harbinger	0.09		Tourist/Harbinger	0.06		Tourist/Harbinger	0.08
Other (Mirage,	0.33		Other (Mirage,	1.37		Other (Mirage,	0.13		Other (Mirage,	0.19		Other (Mirage,	0.21		Other (Mirage,	0.15
Rolling-circles	0.27		Rolling-circles	0.21		Rolling-circles	0.41		Rolling-circles	0.31		Rolling-circles	0.92		Rolling-circles	0.24
Unclassified:	33.56		Unclassified:	33.19		Unclassified:	30.35		Unclassified:	31.67		Unclassified:	28.9		Unclassified:	30.44
Total interspersed	63.03		Total interspersed	63.34		Total interspersed	60.39		Total interspersed	60.39		Total interspersed	55.14		Total interspersed	57.36
Small RNA:	0.22		Small RNA:	0.06		Small RNA:	0.65		Small RNA:	0.31		Small RNA:	0.37		Small RNA:	0.35
Satellites:	0.18		Satellites:	0.08		Satellites:	0.01		Satellites:	0.17		Satellites:	0		Satellites:	0
Simple repeats:	0.8		Simple repeats:	0.78		Simple repeats:	0.62		Simple repeats:	0.73		Simple repeats:	0.6		Simple repeats:	0.63
Low complexity:	0.13		Low complexity:	0.13		Low complexity:	0.13		Low complexity:	0.14		Low complexity:	0.13		Low complexity:	0.15
